# Supplementary material for: A benzimidazole-based chemodosimeter for the fluorometric detection of Zn and Cu via 1,5 proton shifts and C–N bond cleavage
Source: Royal Society of Chemistry journal article supplement (doi:10.1039/c7pp00059f), 2017-05-24
Supplement: c7pp00059f1.pdf [file c7pp00059f1.pdf]

## **Supporting Information**

### **A Benzimidazole based chemodosimeter for the Fluorometric detection of Zn and Cu via 1, 5 proton shifts and C-N Bond Cleavage.**

Sohini Basu Roy<sup>a</sup>, Chandraday Proadhan<sup>b</sup>, Keya Chaudhuri<sup>b</sup>, Kajal Krishna Rajak<sup>a\*</sup>

<sup>a</sup>Inorganic Chemistry Section, Department of Chemistry, Jadavpur University, Kolkata, 700 032, India. E-mail: kajalrajak@hotmail.com, [kkrajak@chemistry.jdvu.ac.in](mailto:kkrajak@chemistry.jdvu.ac.in)

<sup>b</sup> CSIR-Indian Institute of Chemical Biology, Molecular Genetics Division, 4, Raja S. C. Mullick Road, Kolkata – 700032, India

### **CONTENTS**

- 1) <sup>1</sup>H NMR spectrum (S1) of compound ligand APBHN.....
- 2) <sup>13</sup>C NMR spectrum (S2) of compound ligand APBHN.....
- 3) Mass spectrum (S3) of compound ligand APBHN.....
- 4) IR Spectra of Ligand APBHN (S4).
- 5) Mass spectrum (S5) and (S6) of compound Cu-APBHN Complex.
- 6) Mass spectrum (S7) and (S8) of compound Zn-APBHN Complex.
- 7) IR spectra of Cu and Zn complex (S9).
- 8) Determination of Association constant Zinc and Copper complex (S10).
- 9) Determination of Detection limits Zinc and Copper complex (S11).
- 10) Fluorescence spectra of Amino-phenyl benzimidazole and Hydroxy naphthaldehyde(S12).
- 11) Job's plot by Fluorescence method of Zinc and Copper complex (S13).
- 12) Determination of the fluorescence Quantum yield (Table1).
- 13) Photoluminescence decay of ligand APBHN (S14).
- 14) Computational study (Table2).
- 15) Crystal Data
- 16) EPR Study

# <sup>1</sup>H NMR spectrum of Compound APBHN

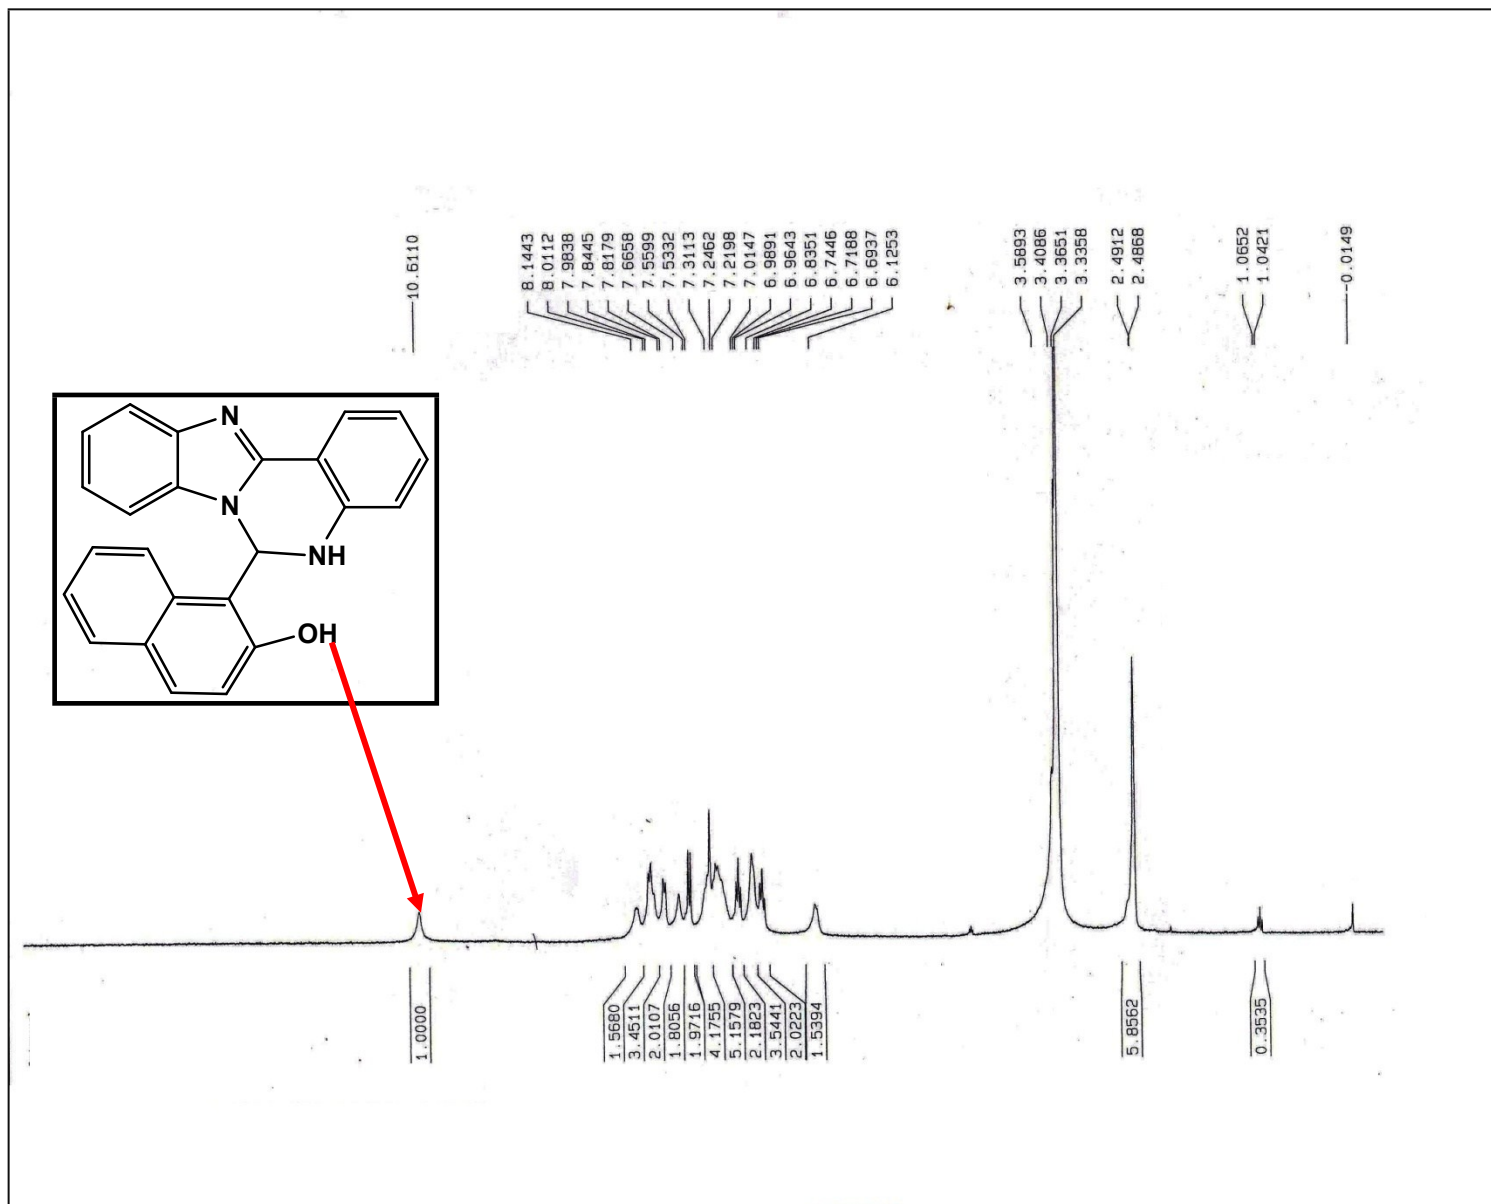

Fig S1: <sup>1</sup>H NMR spectrum of APBHN.

**$^{13}\text{C}$  NMR spectrum of Compound APBHN**

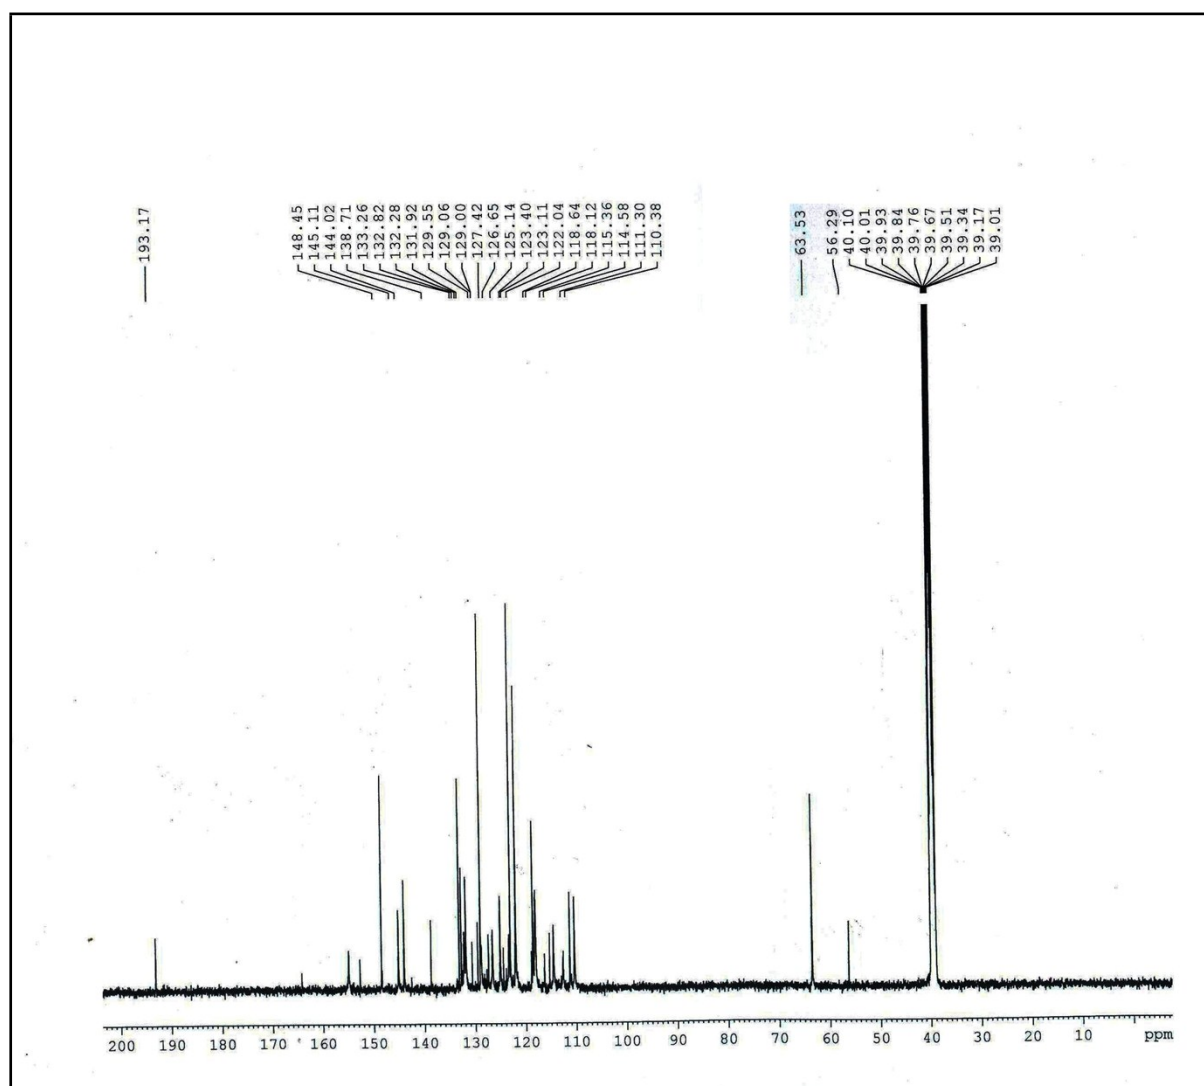

**FigS2:**  $^{13}\text{C}$  NMR spectrum of Compound APBHN.

### Mass spectrum of compound APBHN

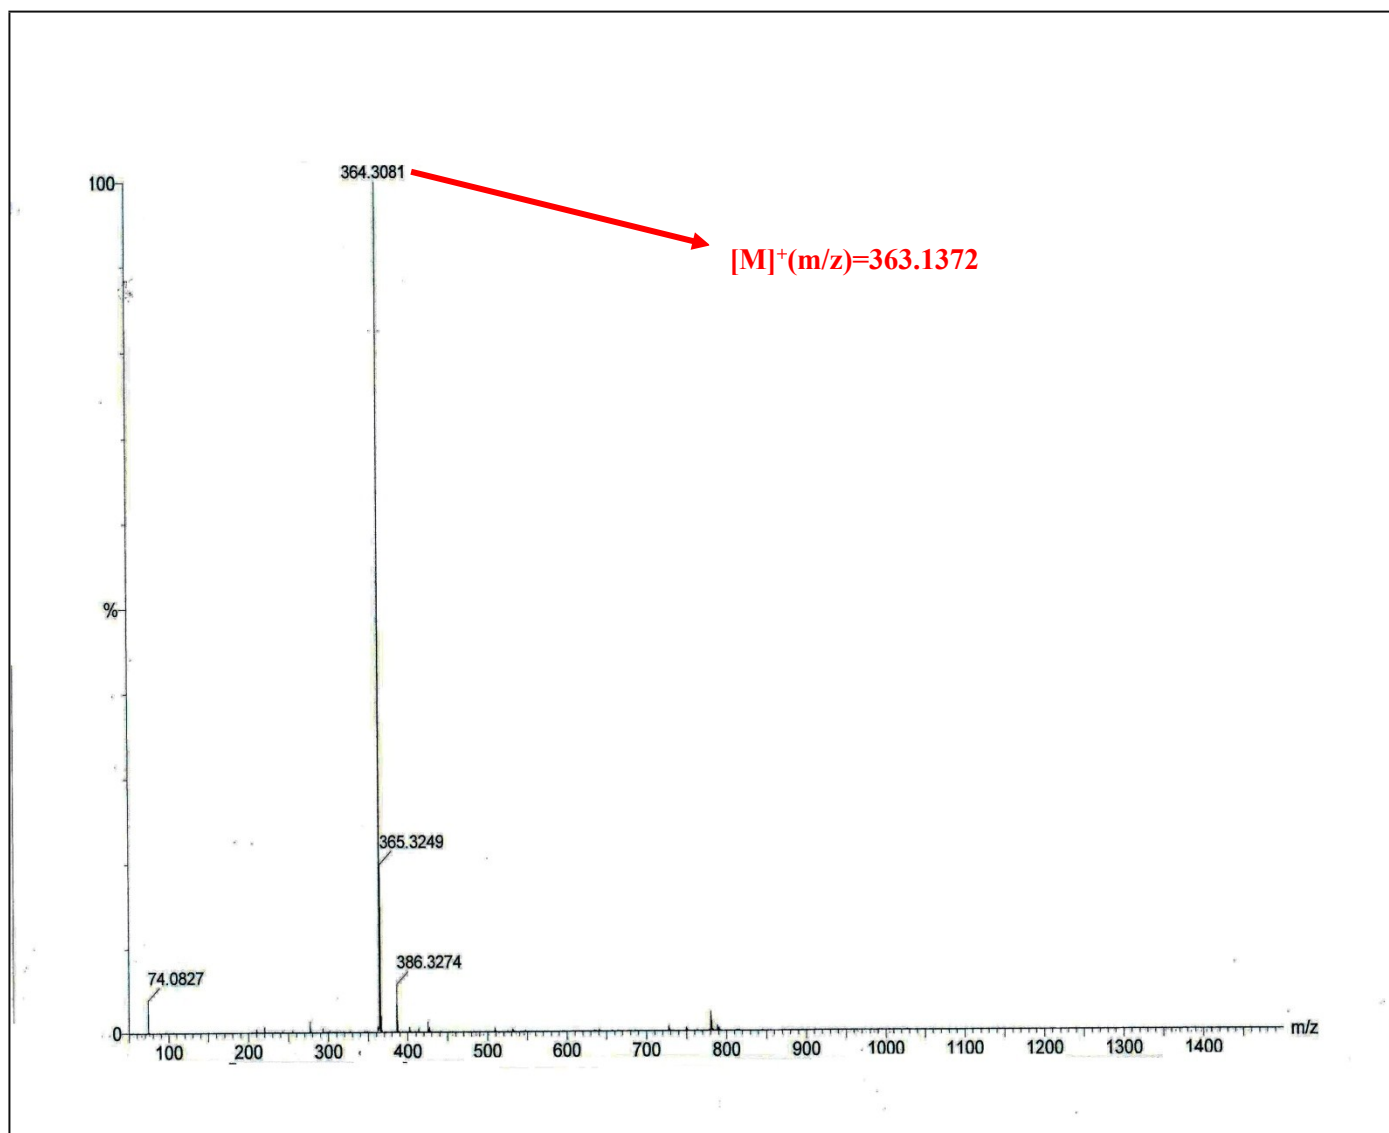

**Fig S3:** Mass spectrum of APBHN.

## IR Spectra of the APBHN

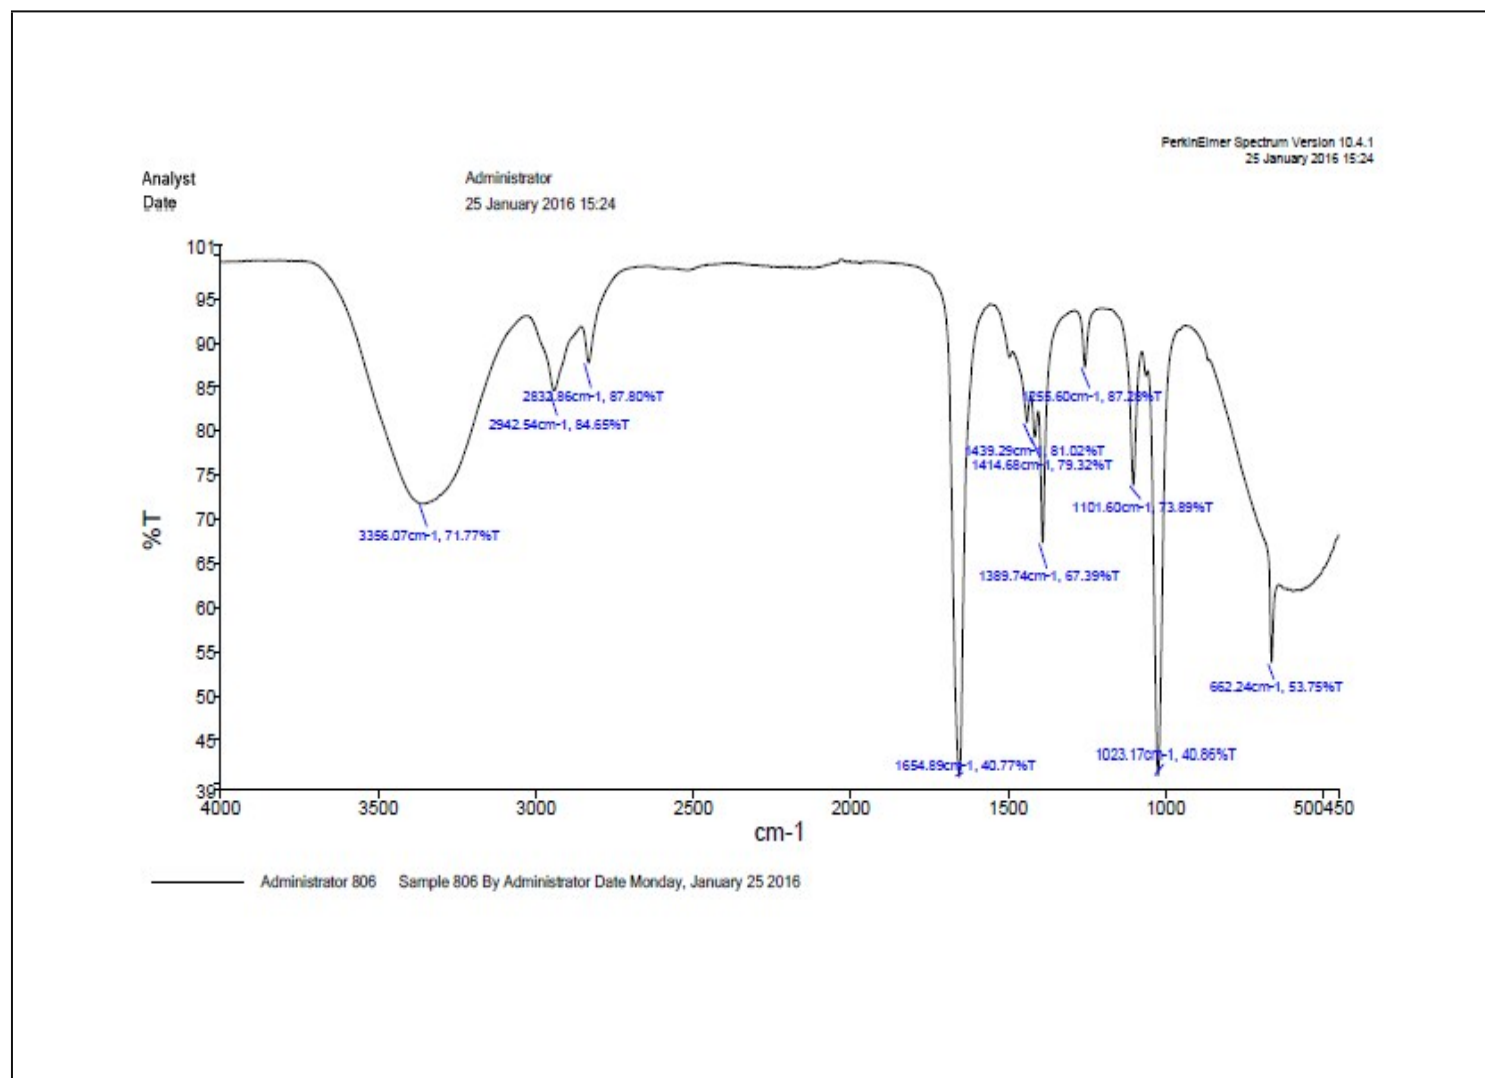

**Fig S4:** IR Spectra of APBHN.

## Mass spectrum of the Cu complex ( 1:1)

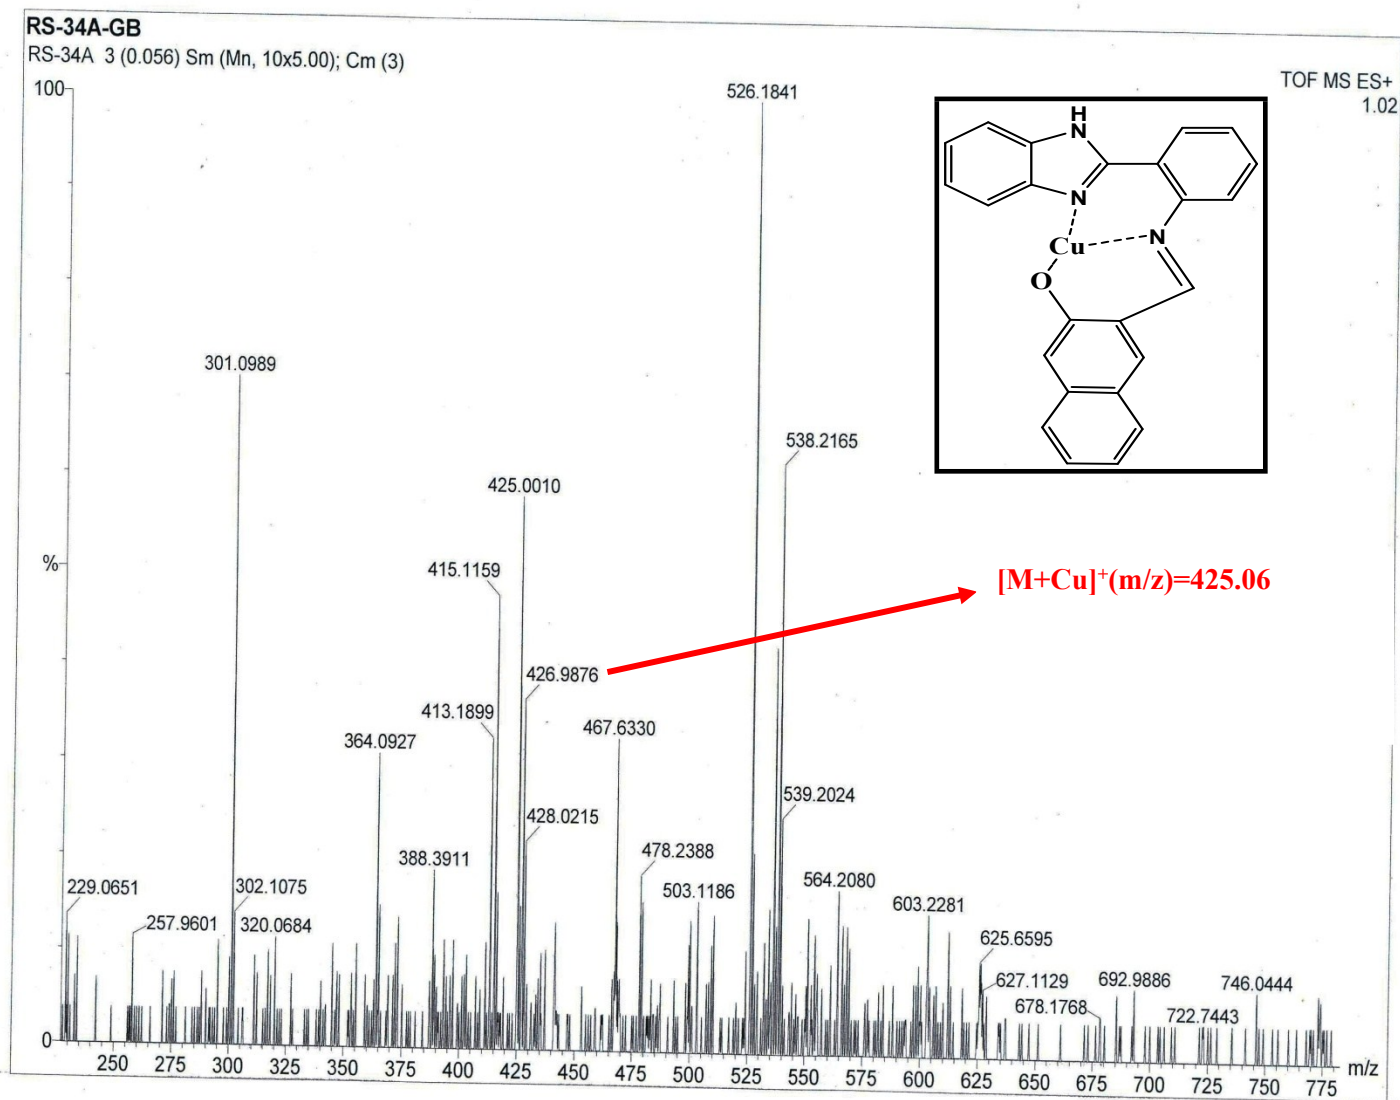

Fig S5. Mass spectrum of Cu-APBHN (1:1)complex.

## Mass spectrum of the Cu complex (1:2)

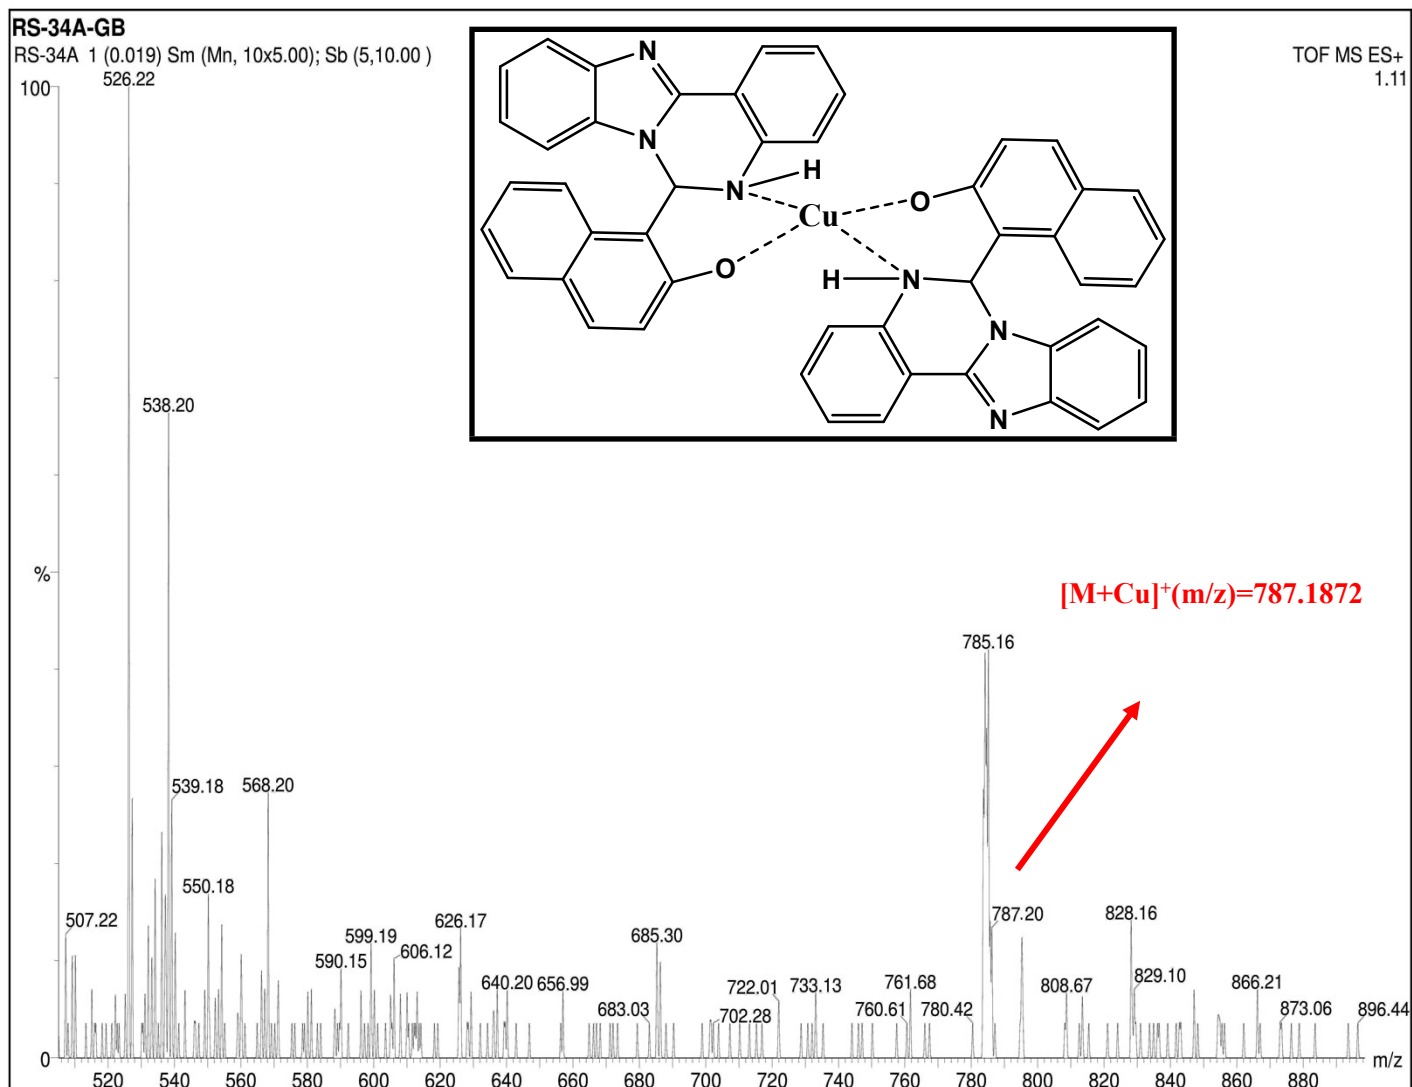

Fig S6. Mass spectrum of Cu-APBHN(1:2) complex.

### Mass spectrum of the Zinc Complex(1:1).

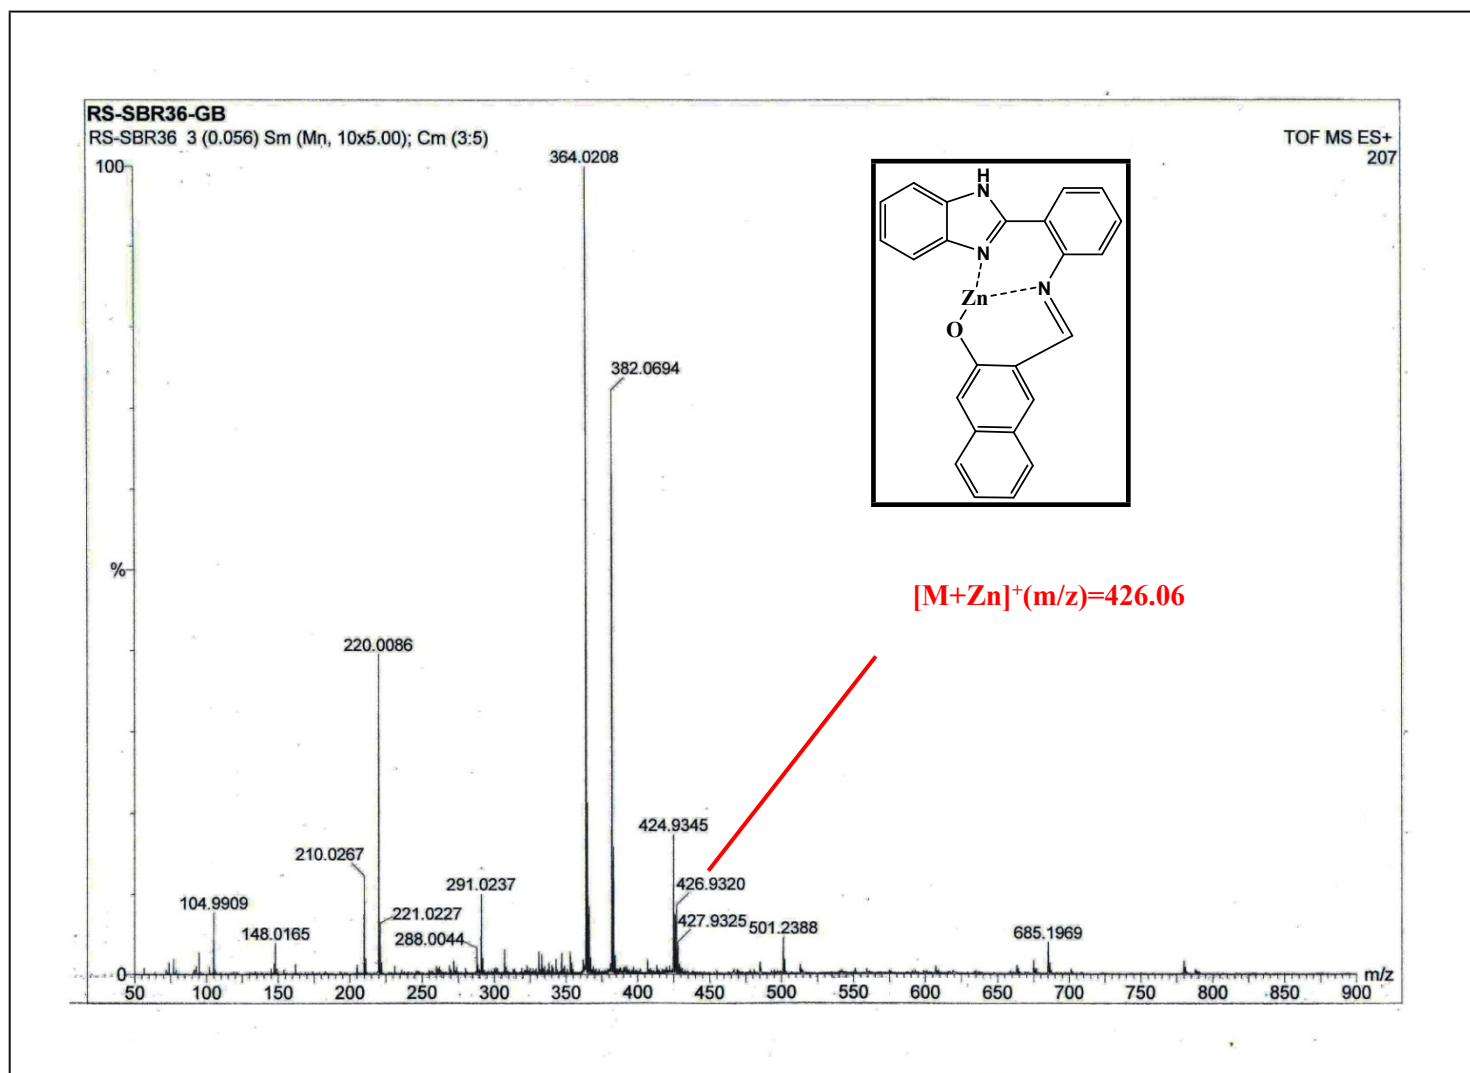

**FigS7:** Mass spectrum of Zn-APBHN(1:1) complex.



Mass spectrum of the Zinc complex (1:2).

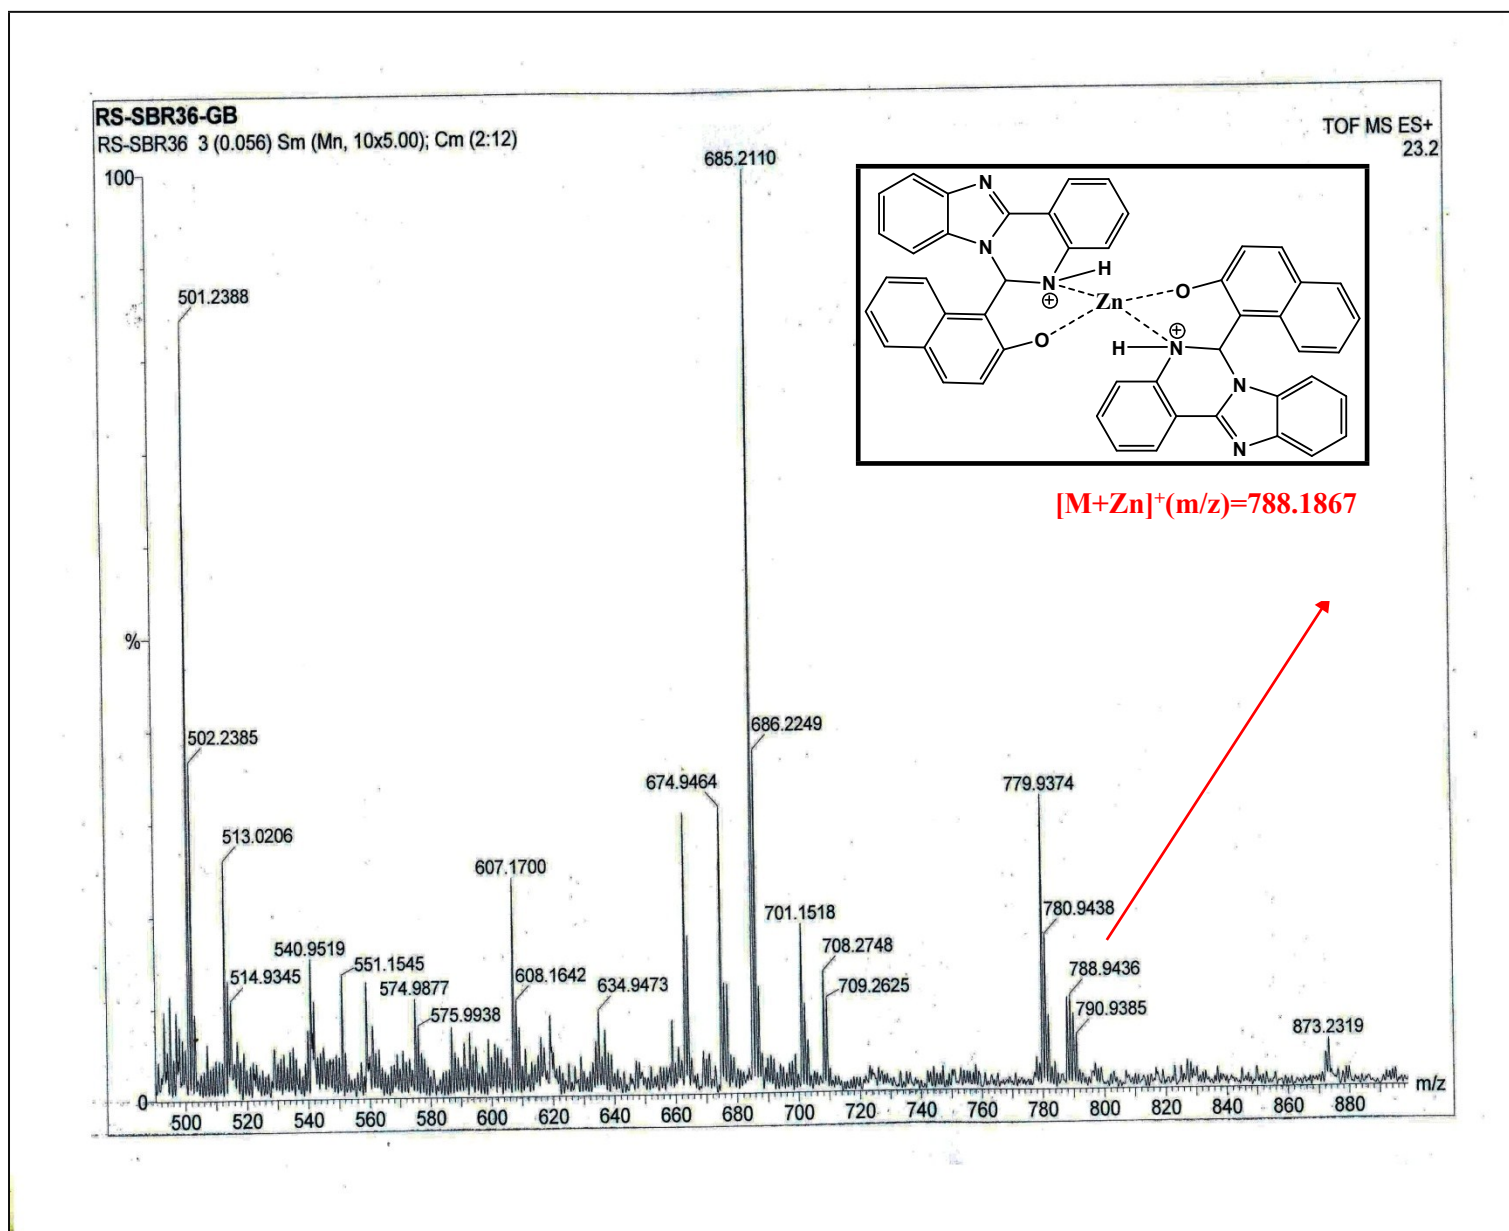

FigS8. Mass spectrum of the Zn-APBHN(1:2) complex.

## IR Spectrum of Copper and Zinc complex:

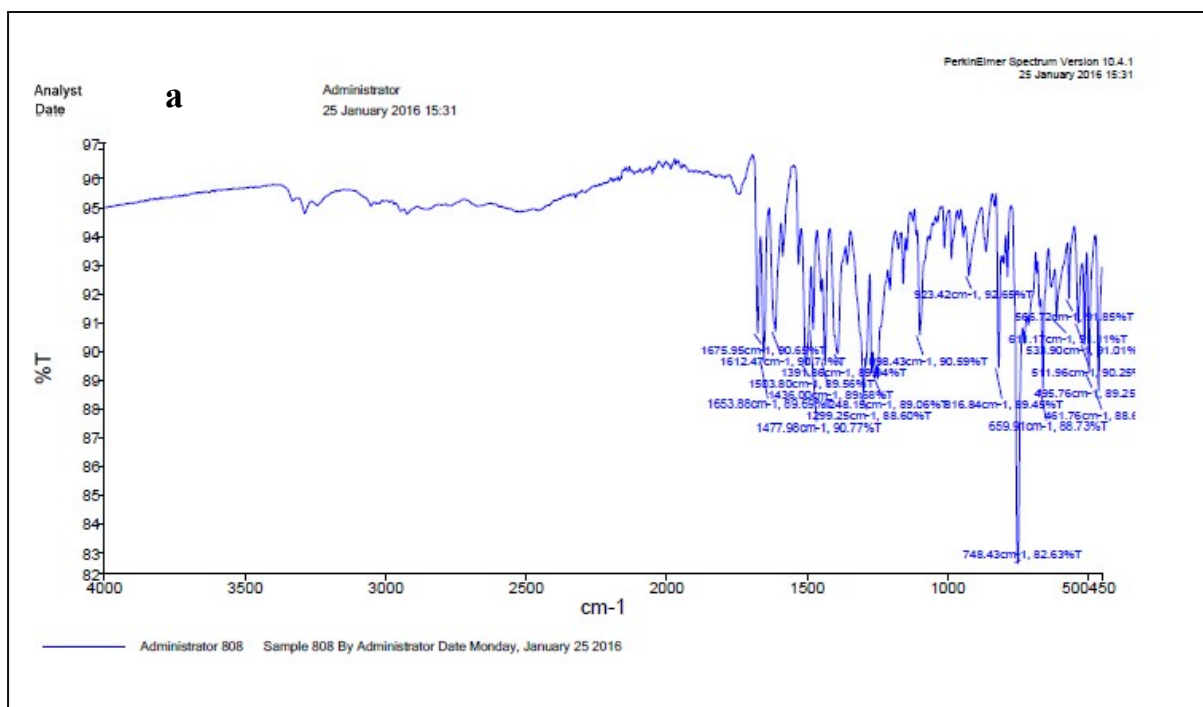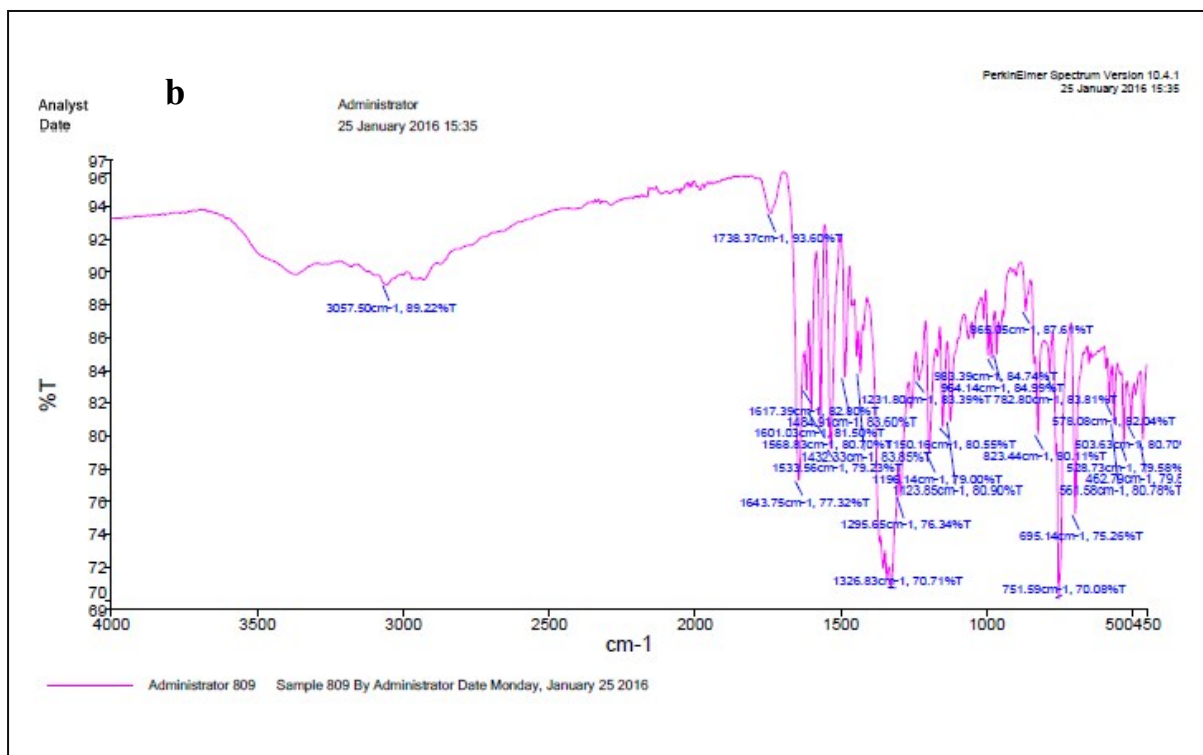

Fig S9.a) IR spectra of the Cu-APBHN complex. b) IR spectra of the Zn-APBHN complex.

## Determination of Association Constant (Ka):

### By UV-vis method:

Association constant was calculated according to the Benesi-Hildebrand equation. Ka was calculated following the equation stated below.

$$1/(A-A_0) = 1/\{K(A_{\max}-A_0) [M^{x+}]^n\} + 1/[A_{\max}-A_0]$$

Here  $A_0$  is the absorbance of receptor in the absence of guest,  $A$  is the absorbance recorded in the presence of added guest,  $A_{\max}$  is absorbance in presence of added  $[M^{x+}]_{\max}$  and  $K_a$  is the association constant, where  $[M^{x+}]$  is  $[Zn^{2+}]$  and  $[Cu^{2+}]$ . The association constant ( $K_a$ ) could be determined from the slope of the straight line of the plot of  $1/(A-A_0)$  against  $1/[M^{x+}]$  and is found to be  $1.34 \times 10^4 \text{ M}^{-1}$  for  $Zn^{2+}$  and  $6.4 \times 10^4 \text{ M}^{-1}$  for  $Cu^{2+}$ .

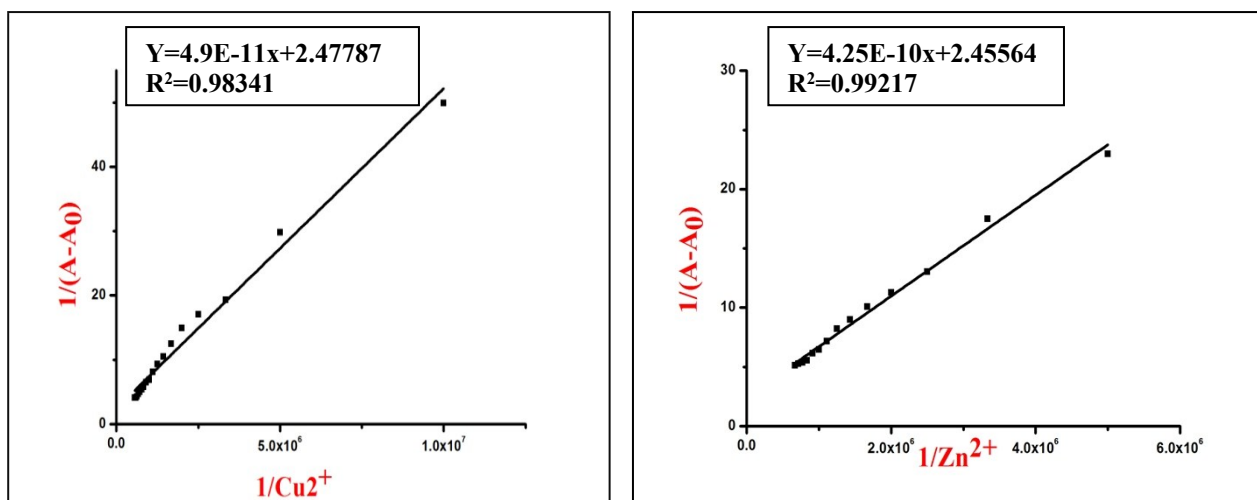

**FigS10.** Benesi-Hildebrand plot from absorption titration data of receptor (10  $\mu\text{M}$ ) with  $Cu^{2+}$  and  $Zn^{2+}$ .

## Calculation of the detection limit

The detection limits DL of APBHN for  $\text{Zn}^{2+}$  and  $\text{Cu}^{2+}$  were determined from the following equation1:

$$\text{DL} = K * \text{Sb1}/S$$

Where  $K = 2$  or  $3$  (we take  $3$  in this case);  $\text{Sb1}$  is the standard deviation of the blank solution;  $S$  is the slope of the calibration curve.

From the graph (a) we get slope =  $1.4 \times 10^{10}$ , and  $\text{Sb1}$  value is  $26100$  and from graph (b) we get slope =  $2.43 \times 10^9$  and  $\text{Sb1}$  value is  $11988$ .

Thus using the formula we get the Detection Limit for  $\text{Zn}^{2+}$  is  $5.59 \mu\text{M}$  i.e. APBHN can detect  $\text{Zn}^{2+}$  ion in this minimum concentration and Detection Limit for  $\text{Cu}^{2+}$  is  $0.148 \mu\text{M}$ .

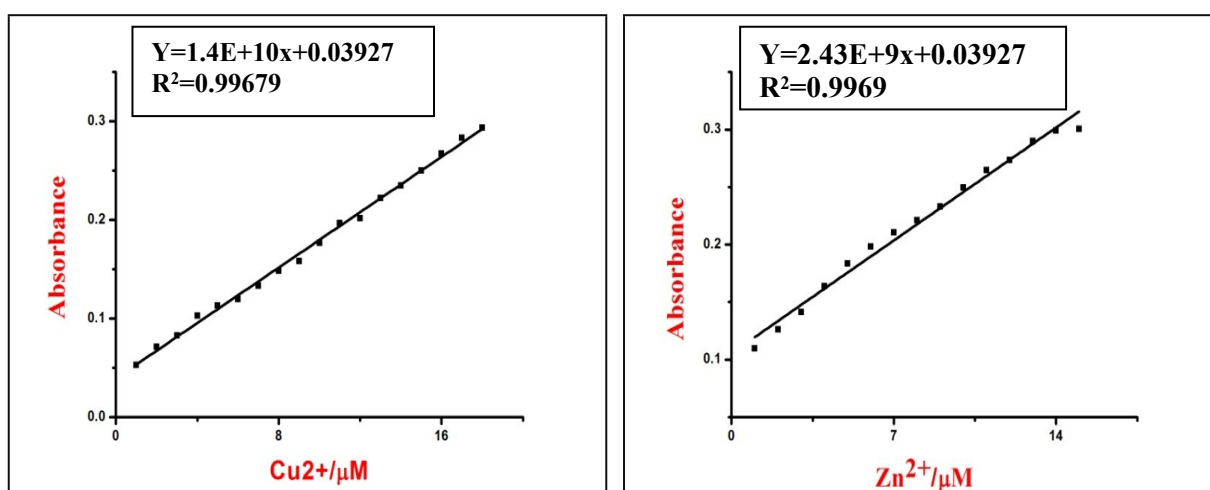

**FigS11:** The linear change of fluorescence intensity as a function of (a)  $[\text{Cu}^{2+}]$  at  $435\text{nm}$  and (b)  $[\text{Zn}^{2+}]$  at  $430 \text{ nm}$ .

## Fluorescence Spectra:

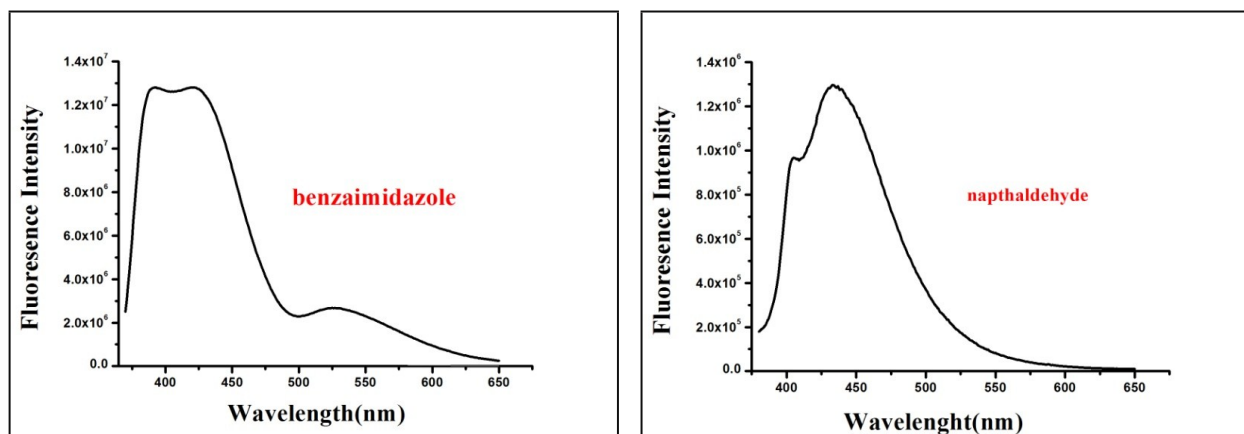

**FigS12.** Fluorescence Intensity plot of a) Amino-phenyl Benzimidazole and b) hydroxy naphthaldehyde.

## Job's plot by absorbance method:

Stock solution of same concentration of sensor and  $Zn^{2+}$  and  $Cu^{2+}$  was prepared in the order of 10  $\mu M$  in (at 25 °C) at pH 7.4 in HEPES buffer. The emission spectrum in each case with different host-guest ratio but equal in volume was recorded. Job's plots were drawn by plotting  $\Delta I \cdot X_{host}$  vs  $X_{host}$  ( $\Delta I$  = change of intensity of the emission spectrum during titration and  $X_{host}$  is the mole fraction of the host in each case, respectively).

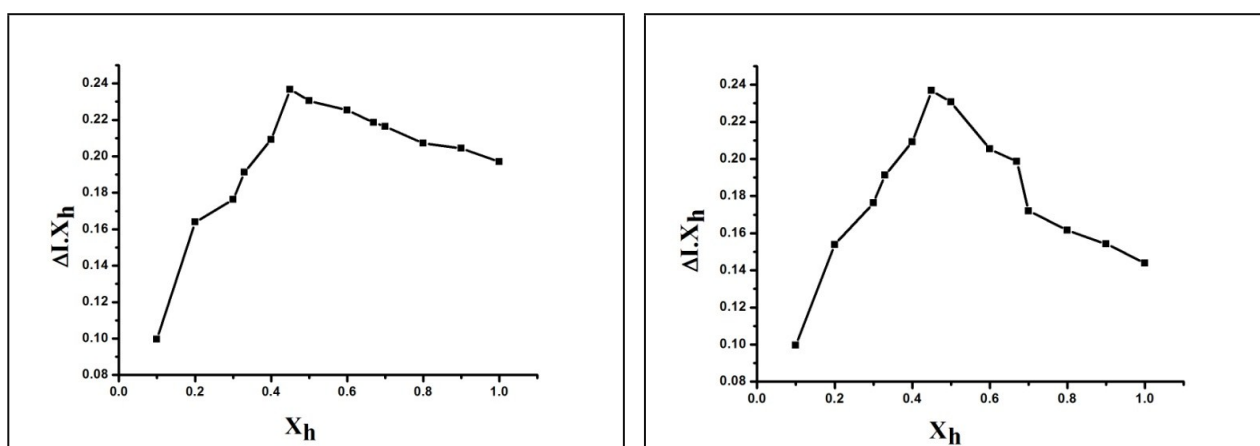

**FigS13.** Jobs plot diagram of HAFPA for a) Cu<sup>2+</sup> and b) Zn<sup>2+</sup>(where X<sub>h</sub> is the mole fraction of host and ΔI indicates the change of the intensity).

**The highest peak at 0.45 indicates the formation of both 1:1 and 1:2 complexes.**

### Determination of the fluorescence quantum yield

Here, the quantum yield φ was measured using the following equation:

$$\Phi_X = \Phi_S \times (I_x/I_s) \times (A_x/A_s) \times (n_x/n_s)^2$$

where X and S indicate the unknown and standard solution respectively, φ = quantum yield, I = area under the emission curve, A = absorbance at the excitation wavelength, and n = index of refraction of the solvent. Here φ measurements were performed using quinine sulphate in ethanol as a standard [φ = 0.54] (error ~ 10%).

### Photophysical parameters of the complexes in Methanol solution at room temperature.

**Table (S1):**

| Sample            | $\lambda_{\max}$ , nm<br>( $\epsilon$ , M <sup>-1</sup> cm <sup>-1</sup> ) | $\lambda_{\text{emi}}$ , nm | $\Phi$ ( $\times 10^{-3}$ )         | $k_r$ , s <sup>-1</sup> ( $\times 10^5$ ) | $k_{nr}$ , s <sup>-1</sup> ( $\times 10^8$ ) | $\tau_1$ , ns                       | $\tau_2$ , ns                       |
|-------------------|----------------------------------------------------------------------------|-----------------------------|-------------------------------------|-------------------------------------------|----------------------------------------------|-------------------------------------|-------------------------------------|
| <b>Ligand</b>     | 398(12612818.3),<br>480(12713784)                                          | 385,480                     | 0.76                                | 7.10(385)<br>7.18(480)                    | 1.77(385)<br>1.77(480)                       | 1.069(385)<br>1.058(480)            | 4.27(385)<br>4.23(480)              |
| <b>Cu Complex</b> | 385(1510855440)<br>430(1298335905)<br>480(1510855440)                      | 385,430,<br>480             | 0.64(385)<br>0.74(430)<br>0.64(480) | 7.55(385)<br>7.12(430)<br>2.16(480)       | 2.94(385)<br>3.19(430)<br>8.46(480)          | 8.47(385)<br>1.95(430)<br>2.96(480) | 3.39(385)<br>7.82(430)<br>1.18(480) |
| <b>Zn Complex</b> | 385(1346850575)<br>430(1254777430)<br>480(1510855440)                      | 385,430,<br>480             | 0.72(385)<br>0.74(430)<br>0.72(480) | 8.15(385)<br>6.04(430)<br>2.80(480)       | 7.21(385)<br>4.24(430)<br>2.61(480)          | 9.44(385)<br>1.29(430)<br>2.60(480) | 3.77(385)<br>5.18(430)<br>1.04(480) |

## Photoluminescence Decay of ligand APBHN

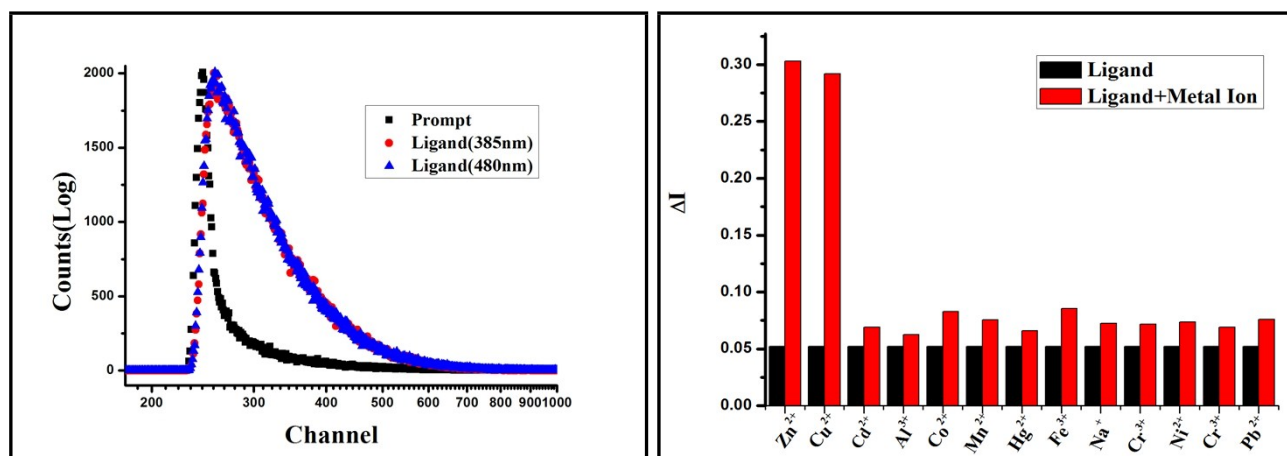

**Fig.S14 :**(a) Changes in the time-resolved photoluminescence decay of Ligand APBHN in methanol at room temperature obtained with 300 nm excitation. The emission at 385 and 480 nm was monitored. (b) Change in the absorbance as bar representation of APBHN ( $c = 1.0 \times 10^{-5}$  M) after addition of 1.0 equiv. of each of the guest cations ( $c = 2.0 \times 10^{-4}$  M) to CH<sub>3</sub>OH–10 mM aqueous HEPES buffer (8/2, v/v, 25 °C) at 430 nm.

## Computational Method

Full geometry optimizations were carried out using the density functional theory (DFT) method at the Becke-3-Lee-Yang-Parr(B3LYP) 24 level for the ligand APBHN and its Zn<sup>2+</sup> and Cu<sup>2+</sup> complexes. The 6-31+G (d,p) basis set was assigned for all the elements. All calculations were performed with Gaussian03 program with the aid of the Gauss View visualization program.

**Table (S2).** Vertical electronic excitations of APBHN, Zn<sup>2+</sup>-APBHN and Cu<sup>2+</sup>- APBHN calculated by TDDFT/B3LYP/CPCM method.

| Compound       | Excitation                  | Theoretical Wavelength (nm) | CI      | $\lambda_{\text{expt.}}$ (nm) |
|----------------|-----------------------------|-----------------------------|---------|-------------------------------|
| APBHN          | HOMO-1 $\rightarrow$ LUMO+3 | 228                         | 0.6004  | 225                           |
|                | HOMO $\rightarrow$ LUMO+2   | 229                         | 0.6325  |                               |
|                | HOMO-2 $\rightarrow$ LUMO   | 288                         | 0.6932  | 290                           |
|                | HOMO-1 $\rightarrow$ LUMO   | 339                         | 0.6081  | 350                           |
| Cu-APBHN (1:2) | HOMO-1 $\rightarrow$ LUMO+3 | 360                         | 0.8680  | 360                           |
|                | HOMO-2 $\rightarrow$ LUMO+1 | 436                         | 0.5825  | 435                           |
| Cu-APBHN (1:1) | HOMO-1 $\rightarrow$ LUMO   | 433                         | 0.3417  | 435                           |
|                | HOMO $\rightarrow$ LUMO+1   | 366                         | 0.3769  | 360                           |
|                | HOMO-1 $\rightarrow$ LUMO   |                             | 0.1169  |                               |
| Zn-APBHN (1:2) | HOMO-3 $\rightarrow$ LUMO+2 | 340                         | 0.16673 | 330                           |
|                | HOMO-1 $\rightarrow$ LUMO   | 422                         | 0.23471 | 425                           |
| Zn-APBHN (1:1) | HOMO $\rightarrow$ LUMO+2   | 420                         | 0.2929  | 425                           |
|                | HOMO $\rightarrow$ LUMO+2   | 333                         | 0.2209  | 330                           |
|                | HOMO $\rightarrow$ LUMO+3   | 291                         | 0.2697  | 290                           |



## Crystal Data

---

| <b>2APBHN,2C<sub>3</sub>H<sub>7</sub>NO</b>                    |                                                               |
|----------------------------------------------------------------|---------------------------------------------------------------|
| Formula                                                        | C <sub>54</sub> H <sub>48</sub> N <sub>8</sub> O <sub>4</sub> |
| <i>M<sub>r</sub></i>                                           | 872                                                           |
| Crystal system                                                 | Monoclinic                                                    |
| Space group                                                    | Cc                                                            |
| <i>a</i> / Å                                                   | 33.1101 (12)                                                  |
| <i>b</i> / Å                                                   | 8.5492 (3)                                                    |
| <i>c</i> / Å                                                   | 16.6530(6)                                                    |
| <i>α</i> /°                                                    | 90.00 (1)                                                     |
| <i>β</i> /°                                                    | 99.906 (1)                                                    |
| <i>γ</i> /°                                                    | 90.00 (1)                                                     |
| <i>V</i> / Å <sup>3</sup>                                      | 4643.6(3) (2)                                                 |
| <i>Z</i>                                                       | 8                                                             |
| <i>D<sub>calcd</sub></i> /mg m <sup>-3</sup>                   | 1.246                                                         |
| <i>μ</i> /mm <sup>-1</sup>                                     | 0.081                                                         |
| <i>θ</i> /°                                                    | 2.28-32.3                                                     |
| <i>T</i> /K                                                    | 293(2)                                                        |
| Reflns collected                                               | 8079                                                          |
| R1, <sup>a</sup> wR2 <sup>b</sup> [ <i>I</i> > 2σ( <i>I</i> )] | 0.0798, 0.2489                                                |
| GOF on <i>F</i> <sup>2</sup>                                   | 1.029                                                         |
| CCDC no                                                        | 1430234                                                       |

---

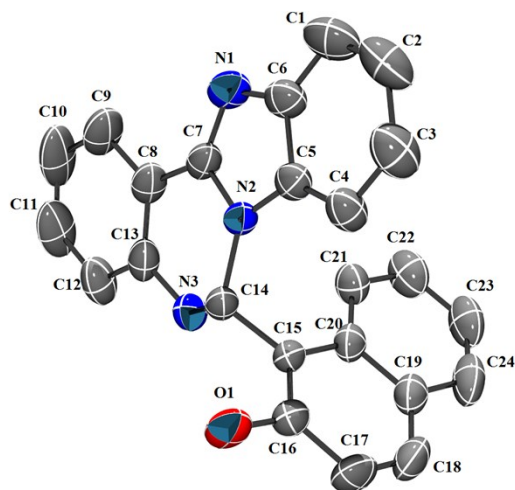

**Table S3:** (a) Crystal data and structure refinement parameters for ligand APBHN. (b) ORTEP plot and atom labelling scheme of **1** at 50% ellipsoid probability. Hydrogen atoms are omitted for clarity

## EPR Study

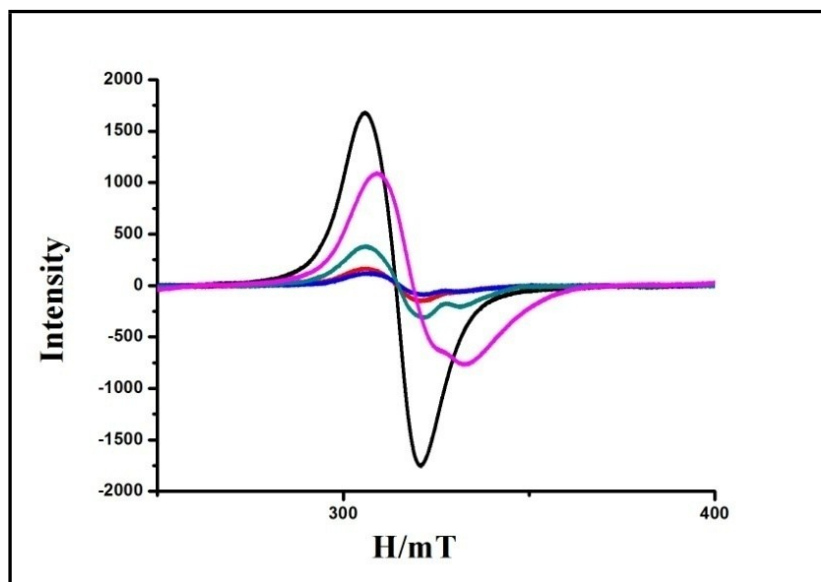

**Fig.S15.** EPR spectrum  $\text{Cu}^{2+}$  with increasing concentration of Ligand APBHN in toluene/ methanol (4:1) at 298 K (instrument settings: microwave frequency, 9.4304 GHz; microwave power, 0.998 mW; modulation frequency, 100 kHz).
